# Supplementary material for: Analysis of VOCs Emitted from Small Laundry Facilities: Contributions to Ozone and Secondary Aerosol Formation and Human Risk Assessment
Source: MDPI journal article supplement (doi:10.3390/ijerph192215130), 2022-11-16
Supplement: s1 [file s1]

## Supplementary Information

### **Analysis of VOCs Emitted from Small Laundry Facilities: Contributions to Ozone and Secondary Aerosol Formation and Human Risk Assessment**

**Da-Mee Eun <sup>1</sup>, Yun-Sung Han <sup>1</sup>, Soo-Hyun Park <sup>1</sup>, Hwa-Seong Yoo <sup>2</sup>, Yen Thi-Hoang Le <sup>3,4</sup>, Sangmin Jeong <sup>5</sup>, Ki-Joon Jeon <sup>3,4,6,\*</sup> and Jong-Sang Youn <sup>1,\*</sup>**

<sup>1</sup> Department of Energy and Environmental Engineering, The Catholic University of Korea,  
Bucheon 14662, Republic of Korea

<sup>2</sup> Lab.SolEmis, Incheon 22212, Republic of Korea

<sup>3</sup> Department of Environmental Engineering, Inha University, Incheon 22212, Republic of Korea

<sup>4</sup> Program on Environmental and Polymer Engineering, Inha University, Incheon 22212, Republic of Korea

<sup>5</sup> Department of Chemistry, University of Massachusetts, Lowell, MA 01854, USA

<sup>6</sup> Particle Pollution Research and Management Center, Incheon 21999, Republic of Korea

\* Correspondence: kjeon@inha.ac.kr (K.-J.J.); jsyoun@catholic.ac.kr (J.-S.Y.)

**Table S1.** Characteristics of adsorbent used for VOCs sampling.

| Sorbents        | Range of adsorption  | Max. temp. (°C) | Strength | Pretreatment condition |
|-----------------|----------------------|-----------------|----------|------------------------|
| Carbopack C     | n-C8 to n-C20        | > 400           | Weak     | 350°C, 2hr             |
| Carbopack B     | (n-C4) n-C5 to n-C12 | > 400           | Medium   | 350°C, 2hr             |
| Carbosieve SIII | n-C2 to n-C5         | 400             | Strong   | 350°C, 2hr             |

**Table S2.** Chemical characteristics and method detection limit (MDL) of the analytes.

| No. | Compound                  | M.W     | B.P (°C) | R.T (min) | MDL (ng) |
|-----|---------------------------|---------|----------|-----------|----------|
| 1   | Chloromethane             | 50.49   | -24.2    | 3.396     | 1.16     |
| 2   | Freon 114                 | 170.93  | 4.1      | 3.478     | 0.67     |
| 3   | Vinyl chloride            | 62.5    | -13.4    | 3.668     | 2.15     |
| 4   | 1,3-Butadiene             | 54.0916 | -4.4     | 3.828     | 3.98     |
| 5   | Bromomethane              | 94.94   | 3.6      | 4.217     | 2.45     |
| 6   | Chloroethane              | 64.52   | 12.3     | 4.42      | 2.29     |
| 7   | Freon 11                  | 137.38  | 23.7     | 5.416     | 3.87     |
| 8   | Acrylonitrile             | 53.06   | 77       | 5.716     | 2.42     |
| 9   | 1,1-Dichloroethene        | 96.95   | 31.7     | 6.327     | 4.77     |
| 10  | Methylene chloride        | 84.94   | 39.8     | 6.47      | 0.88     |
| 11  | 3-Chloropropene           | 76.53   | 45.1     | 6.649     | 6.06     |
| 12  | Freon 113                 | 187.38  | 47.7     | 6.858     | 1.39     |
| 13  | 1,1-Dichloroethane        | 98.96   | 57.3     | 8.406     | 7.29     |
| 14  | Cis-1,2-Dichloroethylene  | 96.94   | 60.3     | 10.141    | 2.65     |
| 15  | Chloroform                | 119.38  | 61.7     | 10.796    | 5.30     |
| 16  | 1,2-Dichloroethane        | 98.96   | 83.5     | 12.493    | 3.13     |
| 17  | Benzene                   | 78.12   | 80.1     | 14.156    | 0.54     |
| 18  | Carbon Tetrachloride      | 153.82  | 76.5     | 14.506    | 3.29     |
| 19  | 1,2-Dichloropropane       | 112.99  | 96.4     | 15.984    | 3.02     |
| 20  | Trichloroethylene         | 131.29  | 87       | 16.529    | 1.71     |
| 21  | Cis-1,3-Dichloropropene   | 110.97  | 104.3    | 18.446    | 7.64     |
| 22  | Trans-1,3-Dichloropropene | 110.97  | 112      | 19.629    | 5.29     |
| 23  | 1,1,2-Trichloroethane     | 133.41  | 113.8    | 20.043    | 0.76     |
| 24  | Toluene                   | 92.15   | 110.6    | 20.725    | 0.60     |
| 25  | 1,2-Dibromoethane         | 187.88  | 131.3    | 22.27     | 4.43     |
| 26  | Chlorobenzene             | 112.56  | 132      | 24.956    | 0.34     |
| 27  | Ethylbenzene              | 106.17  | 136.2    | 25.851    | 0.50     |
| 28  | m&p-Xylene                | 106.17  | 138.3    | 26.293    | 0.39     |
| 29  | Styrene                   | 104.16  | 145.2    | 27.162    | 0.25     |
| 30  | 1,1,2,2-Tetrachloroethane | 106.17  | 144.4    | 27.428    | 5.63     |
| 31  | o-Xylene                  | 167.85  | 146.2    | 27.393    | 0.31     |
| 32  | 4-Ethyltoluene            | 120.19  | 162      | 30.662    | 0.41     |
| 33  | 1,3,5-Trimethylbenzene    | 120.2   | 164.7    | 30.882    | 0.59     |
| 34  | 1,2,4-Trimethylbenzene    | 120.2   | 169.3    | 32.027    | 0.54     |
| 35  | 1,3-Dichlorobenzene       | 147.01  | 173      | 32.484    | 0.54     |
| 36  | 1,4-Dichlorobenzene       | 147.01  | 174      | 32.679    | 0.88     |

|    |                              |          |       |        |      |
|----|------------------------------|----------|-------|--------|------|
| 37 | 1,2-Dichlorobenzene          | 147.01   | 180.5 | 33.701 | 0.56 |
| 38 | 1,2,4-Trichlorobenzene       | 181.45   | 213.5 | 39.322 | 2.40 |
| 39 | Hexachloro-1,3-Butadiene     | 260.8    | 186   | 40.943 | 5.63 |
| 40 | tert-Butyl methyl ether      | 88.15    | 55.2  | 8.468  | 6.28 |
| 41 | Dibromomethane               | 173.83   | 96.95 | 15.951 | 1.58 |
| 42 | 2-Hexanone                   | 100.161  | 128   | 21.29  | 8.06 |
| 43 | Ethane, 1,1,1,2-tetrachloro- | 167.848  | 146.5 | 24.957 | 3.79 |
| 44 | Bromoform                    | 252.73   | 149.1 | 26.532 | 1.77 |
| 45 | Propane, 1,2,3-trichloro-    | 147.43   | 156   | 27.775 | 0.00 |
| 46 | Nitrobenzene                 | 123.11   | 210.9 | 35.275 | 0.31 |
| 47 | Naphthalene                  | 128.1705 | 218   | 39.771 | 1.53 |
| 48 | Ethanol                      | 46.07    | 78.37 | 4.551  | 2.86 |
| 49 | 2-Propanol                   | 60.1     | 82.5  | 5.428  | 2.00 |
| 50 | 1-Propanol                   | 60.0952  | 97    | 7.511  | 1.72 |
| 51 | 2-Butanone                   | 72.11    | 79.64 | 9.098  | 2.50 |
| 52 | Ethyl Acetate                | 88.11    | 77.1  | 10.515 | 1.23 |
| 53 | Hexane                       | 86.18    | 69    | 10.617 | 2.84 |
| 54 | 2,4-Dimethylpentane          | 100.2    | 80.4  | 12.661 | 0.59 |
| 55 | 1-Butanol                    | 74.12    | 117.7 | 13.839 | 1.26 |
| 56 | Bromodichloromethane         | 163.8    | 90    | 16.44  | 0.69 |
| 57 | 2,2,4-Trimethylpentane       | 114.23   | 99    | 16.657 | 0.57 |
| 58 | Heptane                      | 100.21   | 98.42 | 17.215 | 0.55 |
| 59 | 4-Methyl-2-pentanone         | 100.16   | 116   | 18.523 | 0.97 |
| 60 | Dibromochloromethane         | 208.28   | 120   | 21.713 | 0.60 |
| 61 | Octane                       | 114.23   | 125.6 | 23.022 | 0.60 |
| 62 | Nonane                       | 128.2    | 151   | 27.984 | 1.19 |
| 63 | (-)- $\alpha$ -Pinene        | 136.24   | 155   | 29.992 | 2.80 |
| 64 | 3-Ethyltoluene               | 120.19   | 161.1 | 30.581 | 0.82 |
| 65 | 2-Ethyltoluene               | 120.2    | 164   | 31.441 | 0.82 |
| 66 | (-)- $\beta$ -Pinene         | 136.23   | 165   | 31.878 | 0.49 |
| 67 | Decane                       | 142.29   | 174.1 | 32.329 | 1.44 |
| 68 | 1,2,3-Trimethylbenzene       | 120.19   | 176   | 33.326 | 0.92 |
| 69 | (R)-(+)-Limonene             | 136.23   | 176   | 33.752 | 1.87 |
| 70 | Nonanal                      | 142.2386 | 191   | 35.761 | 3.24 |
| 71 | Undecane                     | 156.31   | 196   | 36.235 | 1.45 |
| 72 | Durene                       | 134.22   | 192   | 37.033 | 0.95 |
| 73 | Decanal                      | 156.2    | 207   | 39.463 | 2.16 |
| 74 | Dodecane                     | 170.33   | 216.2 | 39.775 | 0.80 |
| 75 | Tridecane                    | 184.37   | 234   | 43.059 | 0.80 |
| 76 | Tetradecane                  | 198.39   | 253.6 | 46.297 | 0.93 |
| 77 | Pentadecane                  | 212.42   | 270.6 | 50.121 | 1.76 |

---

M.W : Molecular weight, B.P : Boiling point, R.T : Retention time, MDL : Method detection limit

**Table S3.** Information and health impact of toxic carcinogen VOCs.

| No. | Compound             | tumor type                                                                                                                         | Test species      | Route      | Reference                                                                                                      | Last revised |
|-----|----------------------|------------------------------------------------------------------------------------------------------------------------------------|-------------------|------------|----------------------------------------------------------------------------------------------------------------|--------------|
| 1   | Acrylonitrile        | Respiratory cancer                                                                                                                 | humans            | inhalation | O'Berg, 1980                                                                                                   | 09/30/1987   |
| 2   | Methylene chloride   | Hepatocellular carcinomas or adenomas, bronchoalveolar carcinomas or adenomas                                                      | Male B6C3F1 mice  | Inhalation | Mennear et al., 1988; NTP, 1986                                                                                | 11/18/2011   |
| 3   | Benzene              | Leukemia                                                                                                                           | Humans            | Inhalation | Rinsky et al., 1981, 1987; Paustenbach et al., 1993; Crump and Allen, 1984; Crump, 1992, 1994; U.S. EPA, 1998. | 01/19/2000   |
| 4   | Carbon Tetrachloride | pheochromocytoma                                                                                                                   | male BDF1 mouse   | inhalation | Nagano et al. 2007b; JBRC 1998                                                                                 | 03/31/2010   |
| 6   | Nitrobenzene         | liver hepatocellular adenomas or carcinomas, kidney tubular adenomas or carcinomas, thyroid follicular cell adenomas or carcinomas | rat/F344, male    | inhalation | CIIT, 1993                                                                                                     | 02/06/2009   |
| 7   | Bromodichloromethane | kidney (tubular cell adenoma and tubular cell adenocarcinoma)                                                                      | B6C3F1 mice, male | oral       | IRIS, 3/01/1993 and PPRTV, 9/16/2009.                                                                          | 11/18/2015   |
| 8   | 4-Methyl-2-pentanone | mononuclear cell leukemia                                                                                                          | male rat          | inhalation | Henning et al, 2014                                                                                            | 10/17/2017   |
| 9   | Chloromethane        | renal cortical adenomas and adenocarcinomas                                                                                        | male B6C3F1 mice  | inhalation | CCD/WRD, 1/11/2000                                                                                             | 09/16/2015   |

**Table S4.** Information and health impact of toxic non-carcinogen VOCs.

| No. | Compound                 | Influence system     | Critical effect                                                                        | Test species                                    | Route      | Last revised |
|-----|--------------------------|----------------------|----------------------------------------------------------------------------------------|-------------------------------------------------|------------|--------------|
| 1   | Bromomethane             | Nervous, Respiratory | Degenerative and proliferative lesions of the olfactory epithelium of the nasal cavity | Rat 29-month Inhalation Study                   | Inhalation | 04/01/1992   |
| 2   | Toluene                  | Nervous              | Neurological effects in occupationally-exposed workers                                 | Humans                                          | Inhalation | 09/23/2005   |
| 3   | Chlorobenzene            | Respiratory          | respiratory tract irritation, drowsiness and dizziness                                 | Humans                                          | Inhalation | 02/18/2008   |
| 4   | m&p-Xylene               | Nervous              | Impaired motor coordination (decreased rotarod performance)                            | Subchronic inhalation study in male rats        | Inhalation | 02/21/2003   |
| 5   | o-Xylene                 | Nervous              | Impaired motor coordination (decreased rotarod performance)                            | Subchronic inhalation study in male rats        | Inhalation | 02/21/2003   |
| 6   | 1,3-Dichlorobenzene      | Respiratory, Hepatic | respiratory tract, liver damage, headaches and dizziness                               | Humans                                          | Inhalation | 2006         |
| 7   | 1,2,4-Trichlorobenzene   | Respiratory          | respiratory tract                                                                      | Rat and rabbit                                  | Inhalation | 11/2003      |
| 8   | Hexachloro-1,3-Butadiene | Respiratory, Urinary | Renal toxicity, respiratory tract                                                      | Rat                                             | Inhalation | 03/2021      |
| 9   | Ethanol                  | Nervous, Respiratory | respiratory tract, dizziness, nausea, headache                                         | Humans                                          | Inhalation | 09/26/2007   |
| 10  | Hexane                   | Nervous              | Peripheral neuropathy (decreased MCV at 12 weeks)                                      | Rat subchronic inhalation study                 | Inhalation | 12/23/2005   |
| 11  | Ethylbenzene             | Developmental        | Developmental toxicity                                                                 | Rat and rabbit developmental inhalation studies | Inhalation | 03/01/1991   |

**Table S5.** Concentration of VOCs emitted from one cycle of dry cleaning process.

| (unit : ppb) |                        |              |     |                           |            |
|--------------|------------------------|--------------|-----|---------------------------|------------|
| No.          | Compound               | Conc.±S.D.   | No. | Compound                  | Conc.±S.D. |
| 1            | Nonane                 | 409.19±36.17 | 25  | (-)-β-Pinene              | 1.38±0.17  |
| 2            | Decane                 | 319.94±17.94 | 26  | 2,4-Dimethylpentane       | 1.38±1.95  |
| 3            | Undecane               | 127.35±5.42  | 27  | Hexachloro-1,3-Butadiene  | 1.35±1.91  |
| 4            | Nonanal                | 54.15±5.49   | 28  | tert-Butyl methyl ether   | 1.28±0.03  |
| 5            | Decanal                | 29.13±1.82   | 29  | (-)-α-Pinene              | 1.05±0.13  |
| 6            | o-Xylene               | 23.76±11.06  | 30  | 1,1,2,2-Tetrachloroethane | 1.02±0.26  |
| 7            | Chlorobenzene          | 23.58±6.42   | 31  | Ethylbenzene              | 1.01±0.15  |
| 8            | (R)-(+)-Limonene       | 19.3±2.47    | 32  | 1,2,4-Trimethylbenzene    | 0.99±0.05  |
| 9            | Ethanol                | 12.45±3.44   | 33  | 2-Butanone                | 0.92±0.06  |
| 10           | Nitrobenzene           | 10.73±0.77   | 34  | m&p-Xylene                | 0.87±0.1   |
| 11           | Bromomethane           | 8.18±5.79    | 35  | 1,2,4-Trichlorobenzene    | 0.73±0.52  |
| 12           | Dodecane               | 7.12±0.48    | 36  | Bromodichloromethane      | 0.61±0.86  |
| 13           | Hexane                 | 6.02±0.24    | 37  | 1,3,5-Trimethylbenzene    | 0.56±0.03  |
| 14           | Chloromethane          | 5.78±2.35    | 38  | Styrene                   | 0.53±0.03  |
| 15           | Octane                 | 4.22±0.73    | 39  | Benzene                   | 0.47±0.12  |
| 16           | Acrylonitrile          | 3.8±0.11     | 40  | Vinyl chloride            | 0.46±0.65  |
| 17           | 1-Butanol              | 3.68±0.2     | 41  | Tetradecane               | 0.25±0.05  |
| 18           | 2,2,4-Trimethylpentane | 3.62±0.38    | 42  | 1,3-Dichlorobenzene       | 0.21±0.02  |
| 19           | Ethyl Acetate          | 3.44±0.05    | 43  | Pentadecane               | 0.17±0.12  |
| 20           | Heptane                | 3.32±0.05    | 44  | Chloroform                | 0.17±0.24  |
| 21           | Toluene                | 2.62±0.21    | 45  | Freon 113                 | 0.04±0.06  |
| 22           | Methylene chloride     | 2.08±0.27    | 46  | 1,2-Dichlorobenzene       | 0.02±0.02  |
| 23           | 4-Methyl-2-pentanone   | 1.82±0.04    | 47  | 2-Propanol                | 0.01±0.01  |
| 24           | Carbon Tetrachloride   | 1.77±0.01    |     |                           |            |
